# Supplementary material
Source: MDPI journal article supplement (https://www.mdpi.com/2071-1050/15/20/14933)
Supplement: s1 [file s1]

## Supplementary files

**Table S1.** Mean  $\pm$  standard deviation of metal concentration for various macrophyte species parts among seasons

| Variables                        | Cool dry             |                       |                     | Hot dry               |                      |                     | Hot wet              |                    |                     |
|----------------------------------|----------------------|-----------------------|---------------------|-----------------------|----------------------|---------------------|----------------------|--------------------|---------------------|
|                                  | Roots                | Stem                  | Leaves              | Roots                 | Stem                 | Leaves              | Roots                | Stem               | Leaves              |
| <i>Phragmites australis</i>      |                      |                       |                     |                       |                      |                     |                      |                    |                     |
| Na (mg kg <sup>-1</sup> )        | 982.0 $\pm$ 222.5    | 1098.8 $\pm$ 613.9    | 295.0 $\pm$ 180.5   | 1705.5 $\pm$ 553.2    | 1941.5 $\pm$ 449.2   | 318.0 $\pm$ 55.3    | 1529.3 $\pm$ 609.4   | 1545.0 $\pm$ 609.7 | 354.8 $\pm$ 155.2   |
| Mn (mg kg <sup>-1</sup> )        | 3694 $\pm$ 6014.4    | 383.0 $\pm$ 446.8     | 545.8 $\pm$ 525.9   | 1714.5 $\pm$ 1235.9   | 338.5 $\pm$ 453.8    | 776.0 $\pm$ 497.0   | 481.8 $\pm$ 233.3    | 211.3 $\pm$ 148.1  | 221.3 $\pm$ 142.5   |
| Fe (mg kg <sup>-1</sup> )        | 3002.3 $\pm$ 11591.5 | 1302.5 $\pm$ 844      | 1163.3 $\pm$ 867.8  | 29496.8 $\pm$ 11683.3 | 1091.0 $\pm$ 1041.8  | 1350.5 $\pm$ 480.8  | 17450.0 $\pm$ 1191.4 | 2785.0 $\pm$ 597.9 | 944.8 $\pm$ 247.9   |
| Cu (mg kg <sup>-1</sup> )        | 37.5 $\pm$ 4.4       | 5.3 $\pm$ 2.6         | 4.8 $\pm$ 1.5       | 30.0 $\pm$ 9.5        | 3.0 $\pm$ 1.8        | 3.5 $\pm$ 1.9       | 19.1 $\pm$ 12.6      | 4.1 $\pm$ 2.6      | 1.7 $\pm$ 0.5       |
| Zn (mg kg <sup>-1</sup> )        | 37.8 $\pm$ 12.7      | 17.0 $\pm$ 5.2        | 20.8 $\pm$ 8.6      | 39.0 $\pm$ 8.8        | 13.8 $\pm$ 4.9       | 15.5 $\pm$ 5.8      | 19.5 $\pm$ 4.8       | 17.3 $\pm$ 4.6     | 10.9 $\pm$ 4.4      |
| B (mg kg <sup>-1</sup> )         | 31.8 $\pm$ 12.4      | 2.3 $\pm$ 0.5         | 4.0 $\pm$ 0.8       | 33.5 $\pm$ 14.2       | 2.3 $\pm$ 1.3        | 6.0 $\pm$ 2.7       | 10.9 $\pm$ 1.4       | 2.7 $\pm$ 0.9      | 2.5 $\pm$ 1.0       |
| N (%)                            | 1 $\pm$ 0.3          | 1.1 $\pm$ 0.5         | 2.6 $\pm$ 0.4       | 0.9 $\pm$ 0.1         | 0.9 $\pm$ 0.3        | 2.5 $\pm$ 0.6       | 0.8 $\pm$ 0.4        | 0.9 $\pm$ 0.3      | 2.6 $\pm$ 0.5       |
| P (%)                            | 0.1 $\pm$ 0.0        | 0 $\pm$ 0.0           | 0.2 $\pm$ 0.1       | 0.1 $\pm$ 0.0         | 0.1 $\pm$ 0.0        | 0.2 $\pm$ 0.1       | 0.1 $\pm$ 0.0        | 0.1 $\pm$ 0.0      | 0.1 $\pm$ 0.1       |
| K (%)                            | 0.3 $\pm$ 0.2        | 1.4 $\pm$ 0.7         | 2 $\pm$ 0.5         | 0.6 $\pm$ 0.4         | 1.3 $\pm$ 0.7        | 1.5 $\pm$ 0.6       | 0.6 $\pm$ 0.5        | 1.4 $\pm$ 0.5      | 1.5 $\pm$ 0.6       |
| Ca (%)                           | 0.2 $\pm$ 0.1        | 0.1 $\pm$ 0.0         | 0.4 $\pm$ 0.1       | 0.3 $\pm$ 0.2         | 0.1 $\pm$ 0.0        | 0.6 $\pm$ 0.2       | 0.1 $\pm$ 0.0        | 0.1 $\pm$ 0.0      | 0.3 $\pm$ 0.2       |
| Mg (%)                           | 0.1 $\pm$ 0.0        | 0 $\pm$ 0.0           | 0.1 $\pm$ 0.0       | 0.1 $\pm$ 0.0         | 0 $\pm$ 0.0          | 0.1 $\pm$ 0.0       | 0.1 $\pm$ 0.0        | 0.1 $\pm$ 0.0      | 0.1 $\pm$ 0.0       |
| <i>Schoenoplectus corymbosus</i> |                      |                       |                     |                       |                      |                     |                      |                    |                     |
| Na (mg kg <sup>-1</sup> )        | 240.0 $\pm$ 51.4     | 833.7 $\pm$ 579.1     | 1075.7 $\pm$ 1048.2 | 547.0 $\pm$ 296.4     | 2353.3 $\pm$ 1012.5  | 3338.0 $\pm$ 1768.6 | 1603.3 $\pm$ 95.0    | 2263.3 $\pm$ 349.3 | 405.0 $\pm$ 164.4   |
| Mn (mg kg <sup>-1</sup> )        | 676.0 $\pm$ 191.8    | 2856.3 $\pm$ 2124.2   | 897.3 $\pm$ 747.3   | 755.3 $\pm$ 350.2     | 2094.7 $\pm$ 1809.8  | 1002.3 $\pm$ 205.9  | 1980.0 $\pm$ 285.1   | 1227.0 $\pm$ 638.6 | 569.3 $\pm$ 62.6    |
| Fe (mg kg <sup>-1</sup> )        | 2561.0 $\pm$ 2096.6  | 19418.7 $\pm$ 16286.4 | 1981.0 $\pm$ 1502.1 | 3732.3 $\pm$ 2374.6   | 28870.3 $\pm$ 8415.5 | 2819.3 $\pm$ 3365.7 | 20546.7 $\pm$ 3630.8 | 1783.3 $\pm$ 726.2 | 2139.0 $\pm$ 1261.1 |
| Cu (mg kg <sup>-1</sup> )        | 78.7 $\pm$ 61.4      | 23.3 $\pm$ 21.5       | 6.0 $\pm$ 3.5       | 9.3 $\pm$ 4.2         | 28.7 $\pm$ 17.9      | 5.7 $\pm$ 2.3       | 32.6 $\pm$ 3.5       | 3.9 $\pm$ 0.8      | 6.9 $\pm$ 3.2       |
| Zn (mg kg <sup>-1</sup> )        | 28.3 $\pm$ 3.2       | 27.7 $\pm$ 5.7        | 23.0 $\pm$ 14.5     | 29.7 $\pm$ 3.8        | 30.7 $\pm$ 11.0      | 19 $\pm$ 5.6        | 34.2 $\pm$ 14.4      | 15.1 $\pm$ 4.3     | 24.7 $\pm$ 4.2      |
| B (mg kg <sup>-1</sup> )         | 28.3 $\pm$ 18.8      | 20.7 $\pm$ 15.5       | 5.7 $\pm$ 4.0       | 47.3 $\pm$ 19.3       | 35.3 $\pm$ 8.7       | 8.0 $\pm$ 3.5       | 14.5 $\pm$ 2.7       | 5.6 $\pm$ 0.4      | 17.1 $\pm$ 1.9      |
| N (%)                            | 1.4 $\pm$ 0.2        | 1.1 $\pm$ 0.8         | 0.9 $\pm$ 0.6       | 1.3 $\pm$ 0.4         | 0.8 $\pm$ 0.3        | 1.2 $\pm$ 0.5       | 0.5 $\pm$ 0.1        | 1 $\pm$ 0.6        | 1.6 $\pm$ 0.6       |
| P (%)                            | 0.2 $\pm$ 0.0        | 0.1 $\pm$ 0.1         | 0.1 $\pm$ 0.0       | 0.2 $\pm$ 0.1         | 0.1 $\pm$ 0.0        | 0.1 $\pm$ 0.0       | 0.1 $\pm$ 0.0        | 0.1 $\pm$ 0.0      | 0.2 $\pm$ 0.0       |

|                           |                 |                  |                  |                  |                 |                 |                 |                  |                 |
|---------------------------|-----------------|------------------|------------------|------------------|-----------------|-----------------|-----------------|------------------|-----------------|
| K (%)                     | 1 ± 0.2         | 0.9 ± 0.6        | 2 ± 1.0          | 1.1 ± 0.6        | 0.7 ± 0.3       | 3 ± 0.5         | 0.4 ± 0.3       | 2.3 ± 0.8        | 1.2 ± 0.3       |
| Ca (%)                    | 0.6 ± 0.4       | 0.6 ± 0.6        | 0.3 ± 0.3        | 0.6 ± 0.2        | 0.3 ± 0.1       | 0.4 ± 0.1       | 0.2 ± 0.0       | 0.4 ± 0.1        | 0.3 ± 0.0       |
| Mg (%)                    | 0.2 ± 0.2       | 0.2 ± 0.2        | 0.1 ± 0.0        | 0.1 ± 0.0        | 0.1 ± 0.0       | 0.2 ± 0.1       | 0.1 ± 0.0       | 0.2 ± 0.0        | 0.1 ± 0.0       |
| <i>Typha capensis</i>     |                 |                  |                  |                  |                 |                 |                 |                  |                 |
| Na (mg kg <sup>-1</sup> ) | 7951.5 ± 3083.7 | 3767.5 ± 1501.2  | 11283.5 ± 3392.0 | 5574.5 ± 4038.3  | 8407.0 ± 3392.0 | 5259.0 ± 5757.3 | 3455.0 ± 982.9  | 10585.0 ± 3392.0 | 5870.0 ± 2644.6 |
| Mn (mg kg <sup>-1</sup> ) | 2797.5 ± 178.9  | 1206.0 ± 15.6    | 1424.0 ± 396.0   | 3423.5 ± 1282.0  | 1729.0 ± 396.0  | 3797.5 ± 2235.2 | 1855.0 ± 162.6  | 1126.5 ± 396.0   | 2570.0 ± 862.7  |
| Fe (mg kg <sup>-1</sup> ) | 725.0 ± 642.1   | 28062.0 ± 9244.7 | 2905.5 ± 65.8    | 24040.0 ± 3790.1 | 4071.0 ± 65.8   | 784.5 ± 512.7   | 26235.0 ± 473.8 | 3260.0 ± 65.8    | 856.5 ± 372.6   |
| Cu (mg kg <sup>-1</sup> ) | 5.5 ± 0.7       | 92.5 ± 65.8      | 9.5 ± 0.7        | 28.5 ± 2.1       | 9.0 ± 0.7       | 4.0 ± 0.0       | 36.6 ± 14.1     | 9.5 ± 0.7        | 4.7 ± 1.3       |
| Zn (mg kg <sup>-1</sup> ) | 21.0 ± 8.5      | 47.0 ± 5.7       | 40.5 ± 17.7      | 283.5 ± 352.8    | 61.0 ± 17.7     | 19.5 ± 9.2      | 37.4 ± 13.9     | 28.5 ± 17.7      | 16.2 ± 1.8      |
| B (mg kg <sup>-1</sup> )  | 12.5 ± 3.5      | 31.0 ± 8.5       | 10.5 ± 0.7       | 31.5 ± 4.9       | 13.5 ± 0.7      | 8.5 ± 0.7       | 18.4 ± 4.3      | 11.4 ± 0.7       | 9.8 ± 0.6       |
| N (%)                     | 2 ± 0.4         | 0.7 ± 0.0        | 0.9 ± 0.1        | 0.8 ± 0.1        | 0.9 ± 0.0       | 1.3 ± 0.2       | 0.7 ± 0.4       | 0.7 ± 0.1        | 1.7 ± 0.1       |
| P (%)                     | 0.2 ± 0.1       | 0.1 ± 0.0        | 0.1 ± 0.0        | 0.1 ± 0.0        | 0.1 ± 0.0       | 0.1 ± 0.0       | 0.1 ± 0.0       | 0.1 ± 0.0        | 0.1 ± 0.0       |
| K (%)                     | 2.3 ± 0.6       | 0.8 ± 0.2        | 2.3 ± 1.3        | 1.2 ± 0.1        | 2.2 ± 0.1       | 2.1 ± 0.2       | 1 ± 1.0         | 2.2 ± 1.4        | 1.5 ± 0.4       |
| Ca (%)                    | 1 ± 0.4         | 0.4 ± 0.0        | 1 ± 0.1          | 0.5 ± 0.1        | 1.3 ± 0.6       | 1.4 ± 0.2       | 0.4 ± 0.3       | 1.1 ± 0.2        | 1.2 ± 0.4       |
| Mg (%)                    | 0.3 ± 0.0       | 0.2 ± 0.0        | 0.3 ± 0.1        | 0.3 ± 0.0        | 0.3 ± 0.2       | 0.3 ± 0.0       | 0.2 ± 0.1       | 0.3 ± 0          | 0.3 ± 0.0       |
